# Supplementary material for: Green light enhanced the photostability and catalytic performance of fatty acid photodecarboxylase
Source: Royal Society of Chemistry journal article supplement (doi:10.1039/d3cc00995e), 2023-01-01
Supplement: d3cc00995e1.pdf [file d3cc00995e1.pdf]

## Electronic Supplementary Information

### Green light enhanced the photostability and catalytic performance of fatty acid photodecarboxylase

Ao Xia,<sup>\*ab</sup> Xiaobo Guo,<sup>ab</sup> Yingxin Chai,<sup>ab</sup> Wuyuan Zhang,<sup>cd</sup> Yun Huang,<sup>ab</sup> Xianqing Zhu,<sup>ab</sup> Xun Zhu<sup>ab</sup> and Qiang Liao<sup>\*ab</sup>

<sup>a</sup> *Key Laboratory of Low-grade Energy Utilization Technologies and Systems, Chongqing University, Ministry of Education, Chongqing 400044, China*

<sup>b</sup> *Institute of Engineering Thermophysics, School of Energy and Power Engineering, Chongqing University, Chongqing 400044, China*

<sup>c</sup> *Tianjin Institute of Industrial Biotechnology, Chinese Academy of Sciences, Tianjin 300308, China*

<sup>d</sup> *National Center of Technology Innovation for Synthetic Biology, Tianjin 300308, China*

\* Corresponding authors: [aoxia@cqu.edu.cn](mailto:aoxia@cqu.edu.cn) (Ao Xia); [lqzx@cqu.edu.cn](mailto:lqzx@cqu.edu.cn) (Qiang Liao).

Tel: +86 23 65106832; Fax: +86 23 65102474.

## **1. Materials**

All chemicals and reagents were purchased from Sangon Biotech or Aladdin. They were used without further purification unless otherwise noted.

## **2. Influence of blue and green light on CvFAP catalysis**

### **2.1 Detection of light spectrum characteristics**

The photocatalytic system used in this study is shown in Fig. S1. The light sources were adjusted to blue, green, and red light, respectively. Then, the light spectrum was identified by the QE65000 spectrometer (Ocean Optics Co.).

### **2.2 Catalytic condition of CvFAP**

The broken cells catalyst (CvFAP BCs) was prepared from the recombinant *Escherichia coli* containing CvFAP after supersonic treatment, which was used as CvFAP catalyst in this work.<sup>1,2</sup> Photoenzymatic decarboxylation was conducted under aerobic and anaerobic environments with blue, green, and red light as light sources, respectively. The typical conditions of photoenzymatic decarboxylation were as the following: The reaction mixture included 500  $\mu$ L of Tris-HCl buffer (pH 8.5, 100 mM), 300  $\mu$ L of DMSO as a cosolvent containing 40 mM palmitic acid, and 200  $\mu$ L of CvFAP (with an initial cell dry weight of 140.8 mg/mL) in a 5 mL transparent glass vial. The initial concentration of palmitic acid in the catalytic system was 12 mM. Regarding anaerobic decarboxylation, the reaction vial was deoxygenized in an anaerobic workstation (Concept 400; Ruskinn Technology, UK) and sealed.<sup>2</sup> Deoxygenization

was not performed for aerobic decarboxylation. The decarboxylation reaction was triggered by the illumination of a Light Emitting Diode (LED) light source (light intensity of  $200 \mu\text{mol}\cdot\text{m}^{-2}\cdot\text{s}^{-1}$ ) and stirring at 200 rpm and 30 °C for 1 h. The pentadecane yield was detected according to our previous work.<sup>1</sup>

To further improve the catalytic efficiency of CvFAP under green light illumination, the influence of catalytic time (i.e., 30, 60, 120, and 150 min) on the pentadecane yield was investigated following the aforementioned typical conditions.

### **3. Influence of blue and green light on the catalytic stability of CvFAP**

The influences of blue and green light on photoenzymatic decarboxylation at both a low CvFAP concentration and a high substrate concentration were conducted to investigate the catalytic stability of CvFAP under aerobic and anaerobic environments. The catalytic condition followed the aforementioned typical conditions, except for using 100  $\mu\text{L}$  of CvFAP and 54 mM of palmitic acid.

The reactive oxygen species (ROS) in the catalytic system of CvFAP under an aerobic environment were assessed with electron paramagnetic resonance (EPR) to explore the influence mechanism of the blue and green light on the catalytic stability of CvFAP according to our previous work.<sup>2</sup>

### **4. Influence of blue and green light preillumination on CvFAP catalysis**

Since CvFAP is readily suppressed in the blue light preillumination with substrate absent.<sup>2-4</sup> The influences of blue and green light preillumination on CvFAP catalysis

under aerobic and anaerobic environments were investigated. In blue light preillumination under aerobic and anaerobic environments, a 5 mL transparent glass vial containing 500  $\mu\text{L}$  of Tris-HCl buffer (pH 8.5, 100 mM) and 200  $\mu\text{L}$  of CvFAP was preilluminated at 200  $\mu\text{mol}\cdot\text{m}^{-2}\cdot\text{s}^{-1}$  of blue light, 200 rpm, and 30 °C for various time (*i.e.*, 10, 20, 40, and 60 min). Subsequently, to assess the residual activity of CvFAP, 300  $\mu\text{L}$  of DMSO cosolvent containing 40 mM palmitic acid was supplemented in the transparent glass vial to initiate the photoenzymatic decarboxylation for 2 h. Identically, the green light preillumination followed the aforementioned procedure using green light instead of blue light. The ratio of pentadecane yield after preillumination to pentadecane yield without preillumination represented the residual activity of CvFAP.

Since almost no ROS was generated in the preillumination system under an anaerobic environment,<sup>2</sup> the production of ROS in the preillumination system under an aerobic environment was assessed with EPR to further explore the influence mechanism of the blue and green light preillumination on CvFAP catalysis according to our previous work.<sup>2</sup>

## **5. Influence of blue and green light on photodegradation kinetics of flavin adenine dinucleotide**

Flavin adenine dinucleotide (FAD) is the key site of CvFAP to capture photons, and its photostability plays a vital role in the catalytic stability of CvFAP.<sup>5-7</sup> The absorption spectrums of FAD under blue and green light illumination were detected with an ultraviolet-visible spectrophotometer. Due to different degradation rates of FAD under

blue light and green light illumination, 50  $\mu\text{M}$  of FAD in Tris-HCl buffer (pH 8.5, 100 mM) was illuminated by blue light and green light for various time, in terms of 0, 1, 4, 8, 12, 16, 20, 32, 40, and 48 min for blue light, and 0, 60, 120, 180, 240, 300, 360, 420, and 480 min for green light. The time courses of  $A_{450}$  of FAD under blue light and green light illumination were recorded, which were also fitted with quasi-first order kinetic model as shown in Eq. (1).<sup>8</sup>

$$\ln \frac{C_t}{C_0} = -kt \quad (1)$$

where  $C_0$  is the initial  $A_{450}$  of FAD.  $C_t$  is the  $A_{450}$  of FAD at time  $t$  (min).  $k$  is the degradation rate constant of FAD ( $\text{min}^{-1}$ ).

## 6. Influence of blue and green light on the reaction kinetics of CvFAP

To investigate the influence mechanism of blue and green light on CvFAP activity, the Michaelis-Menten equation (Eq. (2)) was employed to obtain the kinetic characteristics of CvFAP catalysis under blue light illumination and green light illumination. To obtain the initial reaction rate, photoenzymatic decarboxylation with various concentration of palmitic acid at 12, 18, 24, and 30 mM were conducted for 5, 10, 15, and 20 min, where the catalytic system consisted of 100  $\mu\text{L}$  CvFAP, 600  $\mu\text{L}$  Tris-HCl buffer (pH 8.5, 100 mM), and different concentrations of palmitic acid in 300  $\mu\text{L}$  DMSO. The catalytic condition followed the typical decarboxylation condition in Section 2.2. The apparent Michaelis constant ( $K_m$ ) and the maximum reaction rate ( $V_{max}$ ) of CvFAP catalysis under blue light illumination and green light illumination were obtained from the Lineweaver-Burk plot as shown in Eq. (3).

$$v = \frac{V_{\max} [S]}{K_m + [S]} \quad (2)$$

$$\frac{1}{v} = \frac{K_m}{V_{\max}} \cdot \frac{1}{[S]} + \frac{1}{V_{\max}} \quad (3)$$

where  $v$  is the reaction rate at time  $t$ , and  $[S]$  is the concentration of palmitic acid at time  $t$ .

## 7. Influence of blue and green light on the reaction thermodynamics of CvFAP

The thermodynamic characteristics of CvFAP catalysis help to illustrate the influence mechanism of the blue and green light on the CvFAP activity. To obtain the reaction rate constant of CvFAP at different temperatures (10, 15, 20, and 25 °C), the catalytic system consisting of 100  $\mu$ L CvFAP, 600  $\mu$ L Tris-HCl buffer (pH 8.5, 100 mM), and 40 mM of palmitic acid in 300  $\mu$ L DMSO was employed. The catalytic condition followed the typical decarboxylation condition in Section 2.2, where the reaction time were 5, 10, 15, and 20 min. As the photoenzymatic decarboxylation followed a first-order kinetic reaction equation at 12 mM of palmitic acid, the reaction rate constant could be obtained according to Eqs. (4) and (5).

$$\frac{d(S)}{dt} = k(S) \quad (4)$$

$$\ln \frac{(S_t)}{S_0} = kt \quad (5)$$

where  $S$  represents the concentration of palmitic acid.  $S_0$  and  $S_t$  are the concentration of palmitic acid at time 0 and  $t$ , respectively.

The activation energy of CvFAP is obtained according to the Arrhenius equation as shown in Eq. (6).

$$k = Ae^{-E_a/RT} \quad (6)$$

where Arrhenius constant  $A$  and  $E_a$  are the frequency factor ( $\text{min}^{-1}$ ) and activation energy ( $\text{J/mol}$ ).  $R$  is the molar gas constant ( $8.314 \text{ J mol}^{-1} \text{ K}^{-1}$ ).  $T$  is the degree kelvin (K). Eq. (7) can be obtained by taking the natural logarithm of Eq. (6).

$$\ln k = \ln A - \frac{E_a}{RT} \quad (7)$$

The  $\Delta G$  can be obtained according to the Eyring-Polanyi equation of Eq. (8).

$$k = \frac{k_b T}{h} \exp\left(-\frac{\Delta G}{RT}\right) \quad (8)$$

By taking the natural logarithm of Eq. (8) and substituting  $\Delta G = \Delta H - T\Delta S$ , Eq. (9) can be obtained.

$$\ln\left(\frac{k}{T}\right) = -\left(\frac{\Delta H}{RT}\right) + \left[\ln K + \ln\left(\frac{k_b}{h}\right) + \frac{\Delta S}{R}\right] \quad (9)$$

where  $\Delta H$  and  $\Delta S$  are the enthalpy change of activation and entropy change of activation, respectively.  $k$  is the rate constant ( $\text{min}^{-1}$ ).  $T$  is the degree Kelvin (K).  $R$ ,  $k_b$ , and  $h$  are the molar gas constant ( $8.314 \text{ J mol}^{-1} \text{ K}^{-1}$ ), Boltzmann constant ( $1.38 \times 10^{-23} \text{ J/K}$ ), and Planck constant ( $6.63 \times 10^{-34} \text{ J S}$ ), respectively.  $K$  is the mass transfer coefficient.

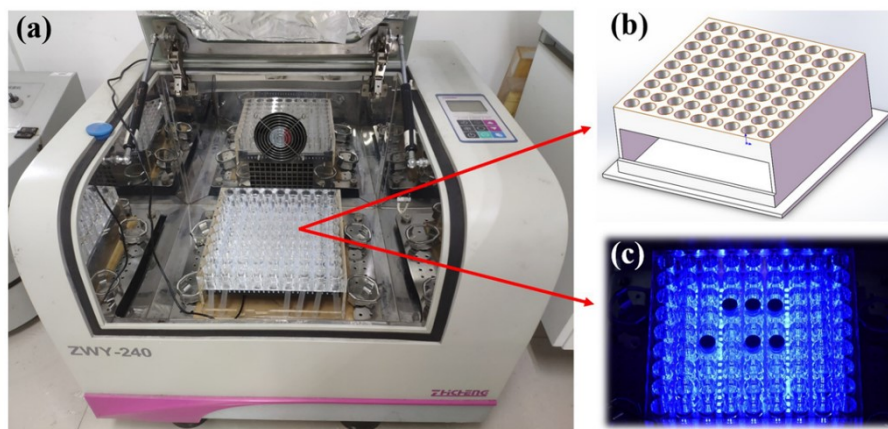

**Fig. S1** Image of homemade photocatalytic system. (a) Image of the reactor. (b) Diagram of the catalytic unit. (c) Image of the catalytic unit.



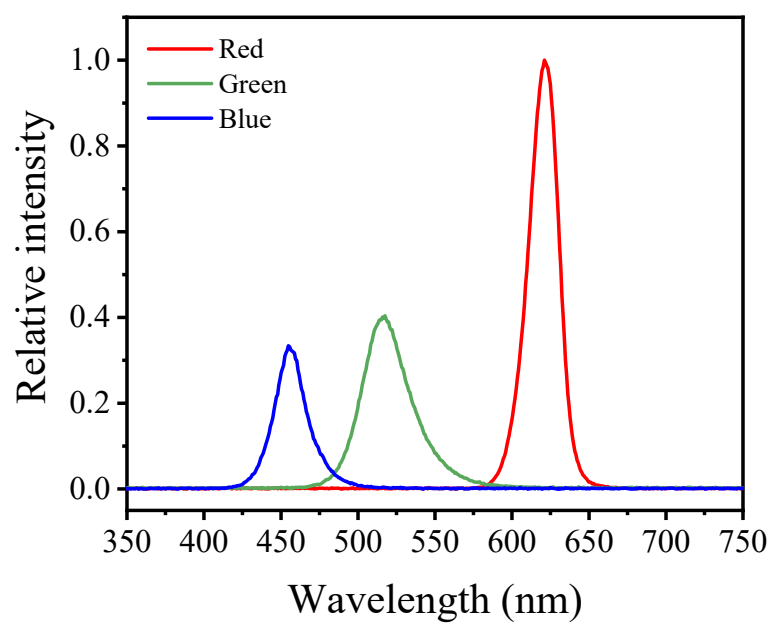

**Fig. S2** The light spectrum of the light sources.

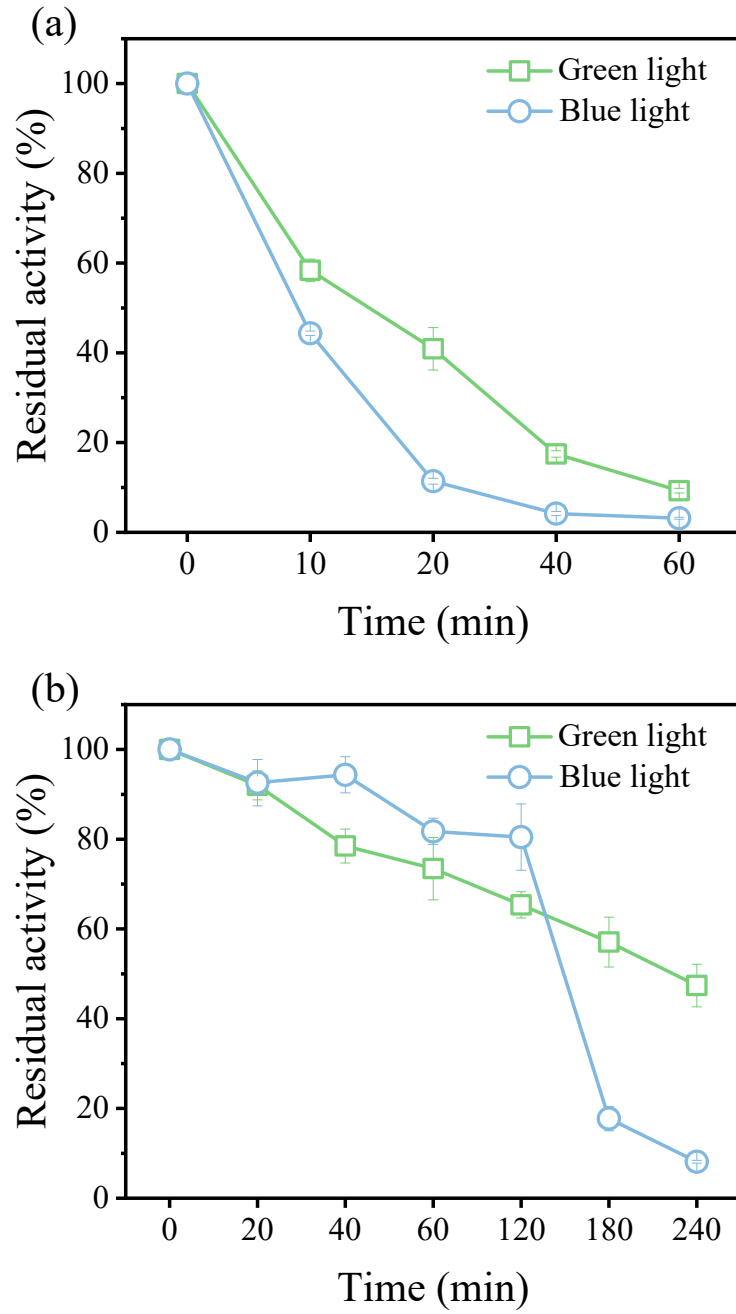

**Fig. S3** Influence of blue and green light preillumination on the residual activity of CvFAP. (a) Preillumination under an aerobic environment. (b) Preillumination under an anaerobic environment.

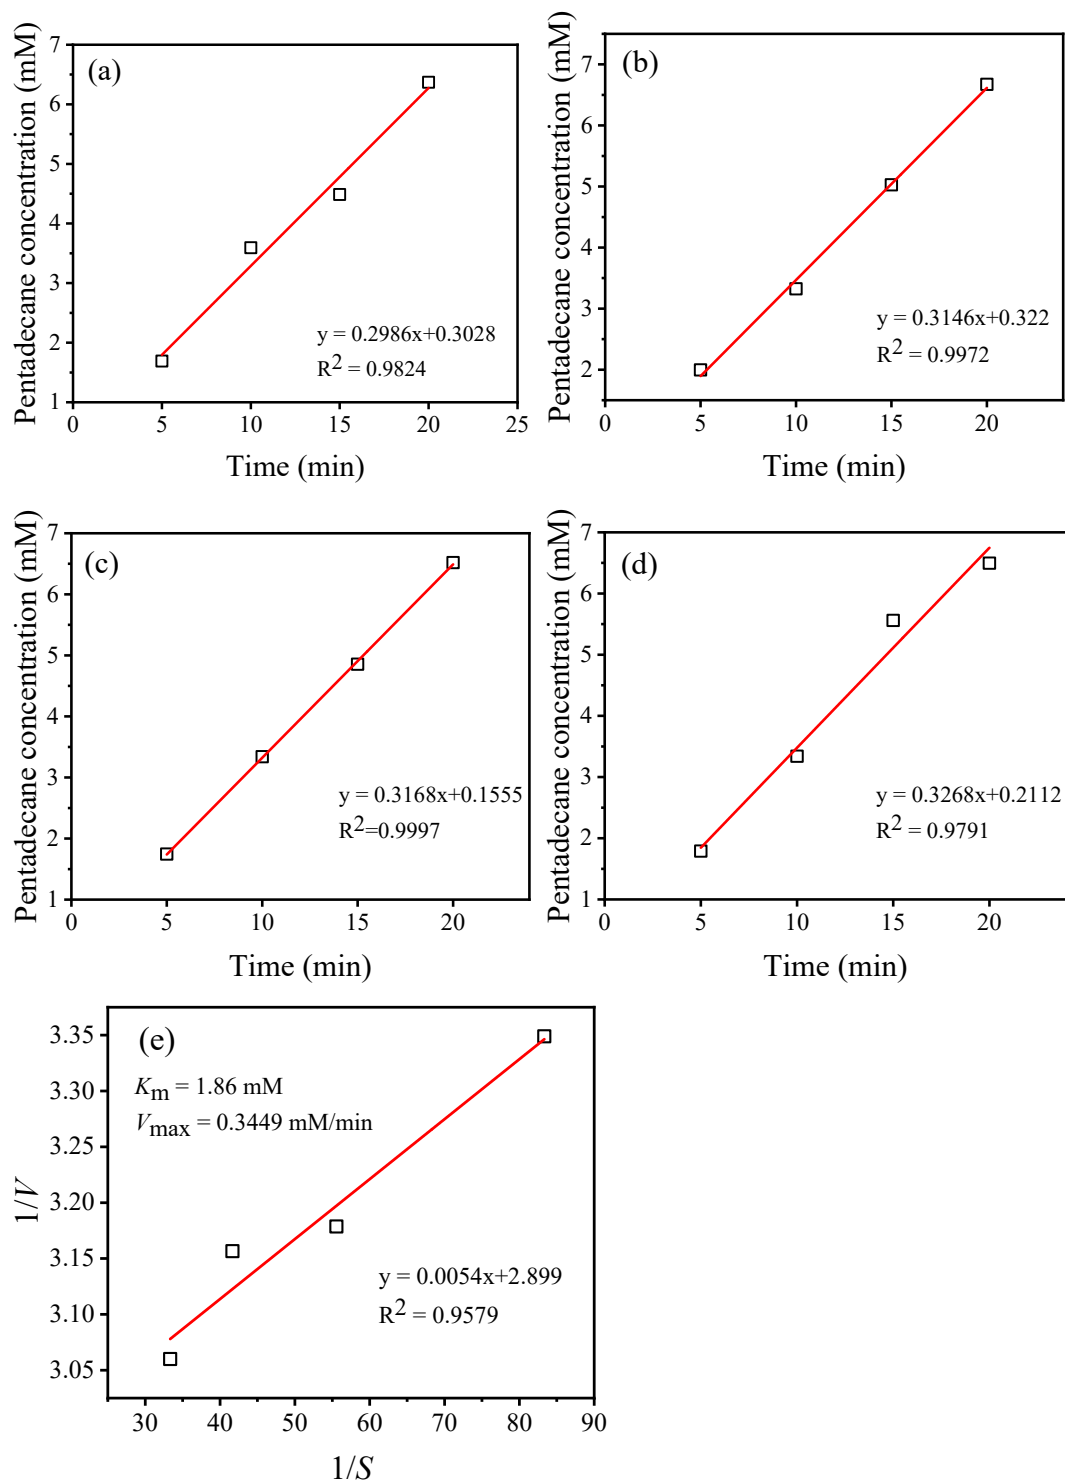

**Fig. S4** Kinetics analysis of CvFAP catalysis under blue light illumination. Initial substrate concentrations in (a)-(d) are 12, 18, 24, and 30 mM, respectively. (e) Lineweaver-Burk plot.

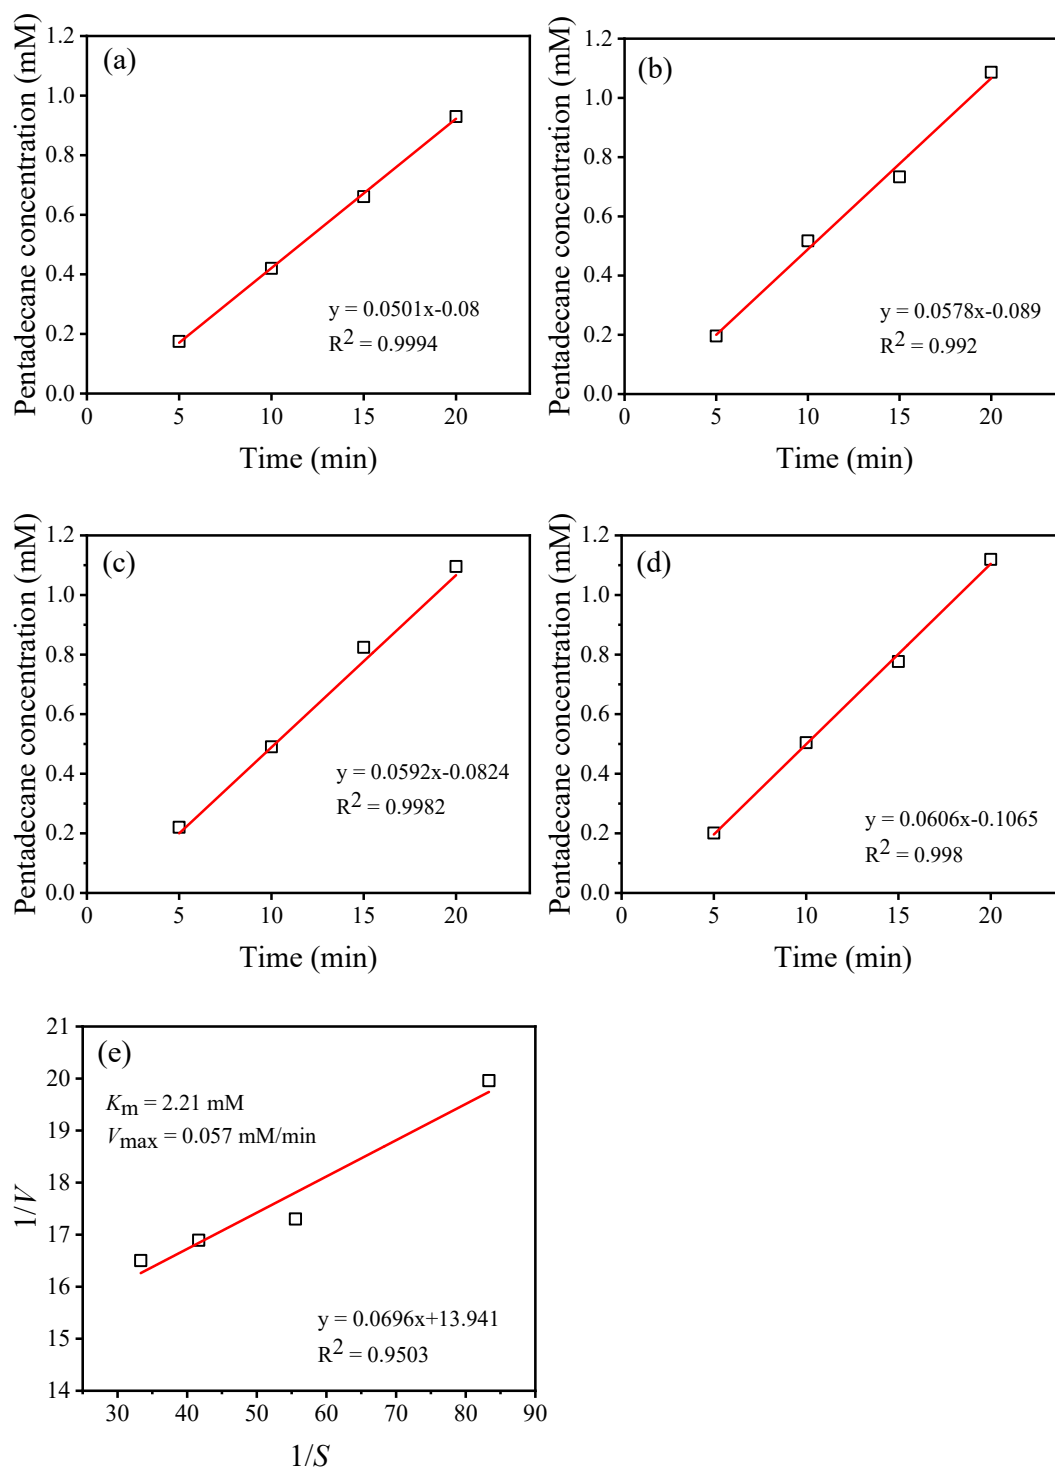

**Fig. S5** Kinetics analysis of CvFAP catalysis under green light illumination. Initial substrate concentrations in (a)-(d) are 12, 18, 24, and 30 mM, respectively. (e) Lineweaver-Burk plot.

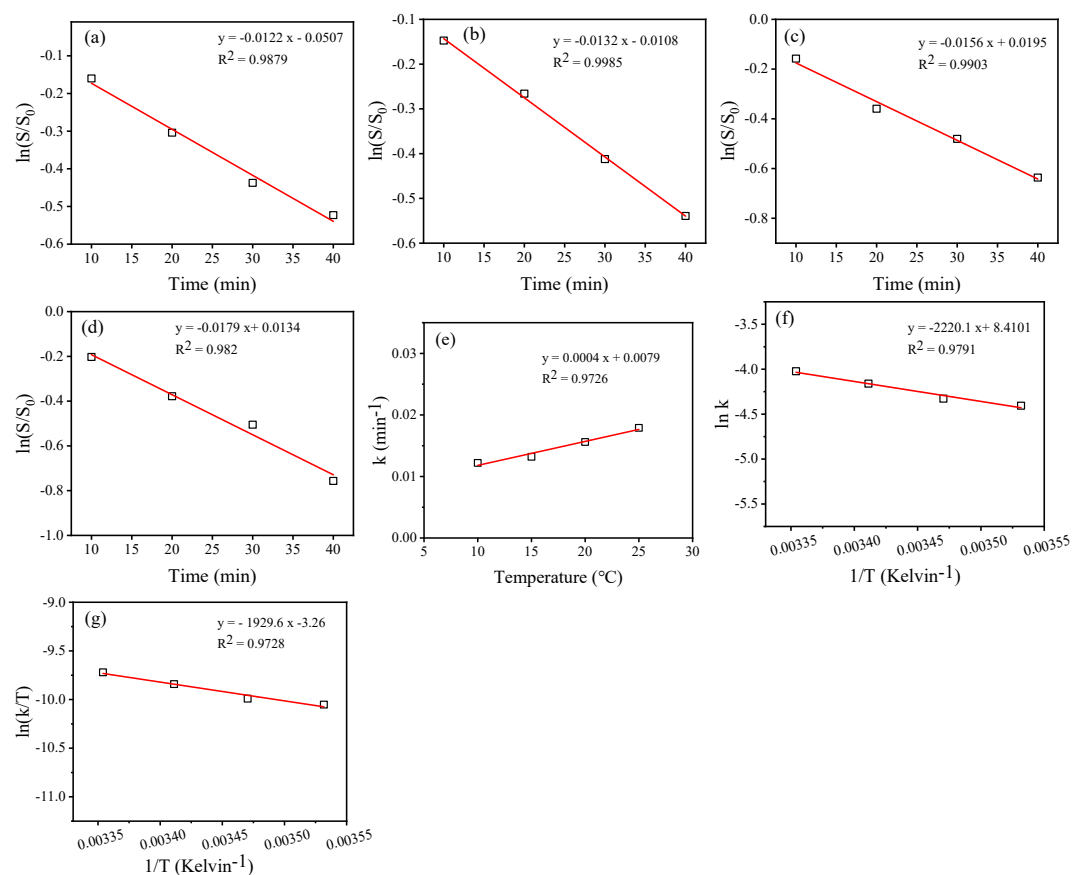

**Fig. S6** Thermodynamic characteristics of CvFAP catalysis under blue light illumination. CvFAP catalysis processes in (a)-(d) are at 10, 15, 20, and 25 °C, respectively. (e) Plots of rate constant vs. temperature. (f) Arrhenius plot of  $\ln k$  vs  $1/T$ . (g) Eyring plot of  $\ln k/T$  vs.  $1/T$ .

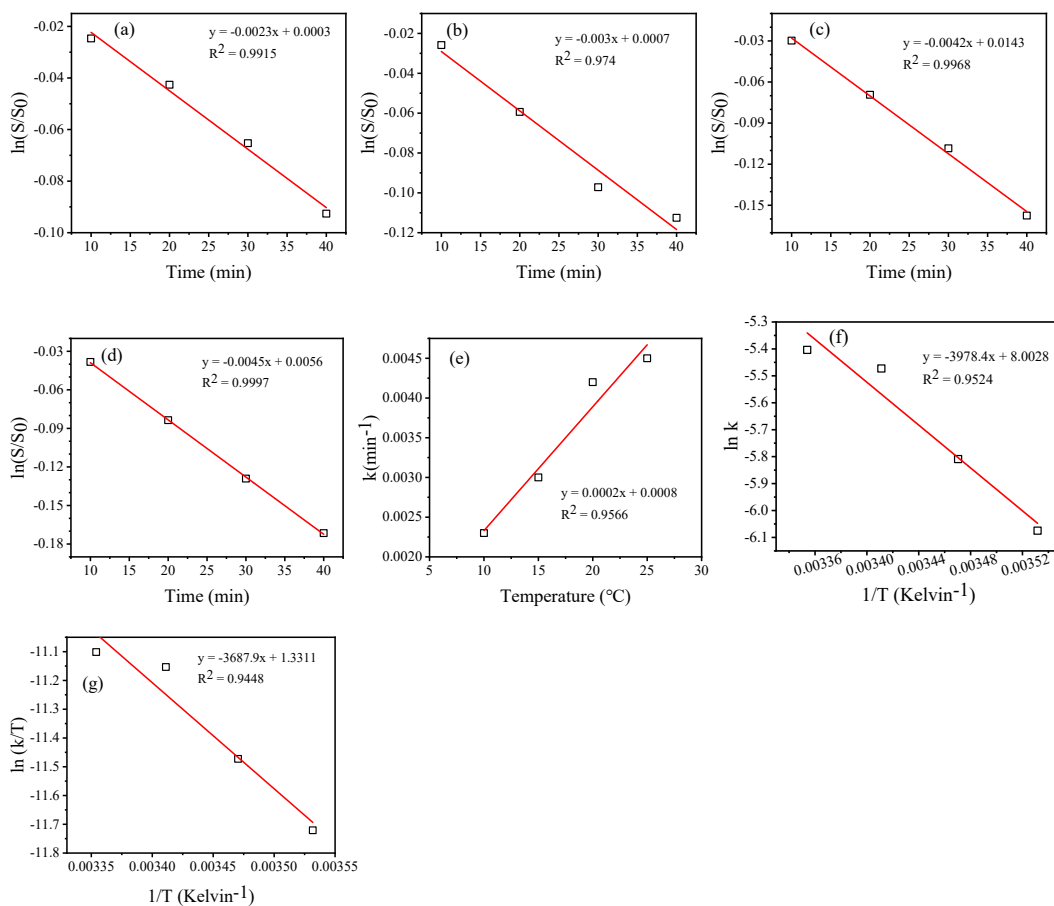

**Fig. S7** Thermodynamic characteristics of CvFAP catalysis under green light illumination. CvFAP catalysis processes in (a)-(d) are at 10, 15, 20, and 25 °C, respectively. (e) Plots of rate constant vs. temperature. (f) Arrhenius plot of  $\ln k$  vs  $1/T$ . (g) Eyring plot of  $\ln k/T$  vs.  $1/T$ .

**Table S1** The light spectrum characteristics of different light sources.

| Light source | Peak wavelength | Half-peak breadth |
|--------------|-----------------|-------------------|
| Blue LED     | 454             | 22                |
| Green LED    | 518             | 35                |
| Red LED      | 621             | 22                |

LED: Light Emitting Diode.

**Table S2** Thermodynamic characteristics of CvFAP catalysis.

| Light sources | $E_a$ (kJ/mol) | $A$ (min <sup>-1</sup> ) | $\Delta H$ (kJ/mol) |
|---------------|----------------|--------------------------|---------------------|
| Blue light    | 18.456         | 4492.2                   | 16.043              |
| Green light   | 33.076         | 2989.3                   | 30.661              |

$E_a$ : Activation energy;  $A$ : Frequency factor;  $\Delta H$ : Enthalpy change of activation.



## References

- 1 X. Guo, A. Xia, F. Li, Y. Huang, X. Zhu, W. Zhang, X. Zhu and Q. Liao. *Energy Conv. Manag.*, 2022, **255**, 115311.
- 2 X. Guo, A. Xia, W. Zhang, F. Li, Y. Huang, X. Zhu, X. Zhu and Q. Liao. *Chin. Chem. Lett.*, 2022, **34**, 107875.
- 3 M. M. E. Huijbers, W. Zhang, F. Tonin and F. Hollmann. *Angew. Chem.-Int. Edit.*, 2018, **57**, 13648-13651.
- 4 Y. Wu, C. E. Paul and F. Hollmann. *ChemBioChem*, 2021, **22**, 2420-2423.
- 5 D. Sorigue, B. Legeret, S. Cuine, S. Blangy, S. Moulin, E. Billon, P. Richaud, S. Brugiere, Y. Coute, D. Nurizzo, P. Mueller, K. Brettel, D. Pignol, P. Arnoux, Y. Li-Beisson, G. Peltier and F. Beisson. *Science*, 2017, **357**, 903-907.
- 6 D. J. Heyes, B. Lakavath, S. J. O. Hardman, M. Sakuma, T. M. Hedison and N. S. Scrutton. *ACS Catal.*, 2020, **10**, 6691-6696.
- 7 D. Sorigue, K. Hadjidemetriou, S. Blangy, G. Gotthard, A. Bonvalet, N. Coquelle, P. Samire, A. Aleksandrov, L. Antonucci, A. Benachir, S. Boutet, M. Byrdin, M. Cammarata, S. Carbajo, S. Cuine, R. B. Doak, L. Foucar, A. Gorel, M. Grunbein, E. Hartmann, R. Hienerwadel, M. Hilpert, M. Kloos, T. J. Lane, B. Legeret, P. Legrand, Y. Li-Beisson, S. L. Y. Moulin, D. Nurizzo, G. Peltier, G. Schiro, R. L. Shoeman, M. Sliwa, X. Solinas, B. Zhuang, T. R. M. Barends, J. P. Colletier, M. Joffre, A. Royant, C. Berthomieu, M. Weik, T. Domratcheva, K. Brettel, M. H. Vos, I. Schlichting, P. Arnoux, P. Mueller and F. Beisson. *Science*, 2021, **372**, 148-159.
- 8 C. K. Remucal and K. McNeill. *Environ. Sci. Technol.*, 2011, **45**, 5230-5237.
